# Supplementary material for: Reversible and irreversible membrane fouling in hollow-fiber UF membranes filtering surface water: effects of ozone/powdered activated carbon treatment
Source: Royal Society of Chemistry journal article supplement (doi:10.1039/d0ra09820e), 2021-01-01
Supplement: d0ra09820e1.pdf [file d0ra09820e1.pdf]

Reversible and irreversible membrane fouling in hollow-fiber UF  
membranes filtering surface water: effects of ozone/powdered  
activated carbon treatment

Weiwei Huang<sup>a,b,c</sup>, Yuanhong Zhu<sup>c</sup>, Lin Wang<sup>d</sup>, Weiguang Lv<sup>a</sup>, Bingzhi Dong<sup>b</sup>,

Wenzong Zhou<sup>a</sup>

a Eco-Environment Protection Research Institute, Shanghai Academy of Agricultural  
Sciences, Shanghai 201403, China

b School of Environmental Science and Engineering, Tongji University, Shanghai  
200092, China

c Shanghai Qingpu Modern Agriculture Park, Shanghai 201403, China

\*Corresponding author. tel.: +86-21-62208660; fax: +86-21-62208660;

E-mail: hwwswx@163.com

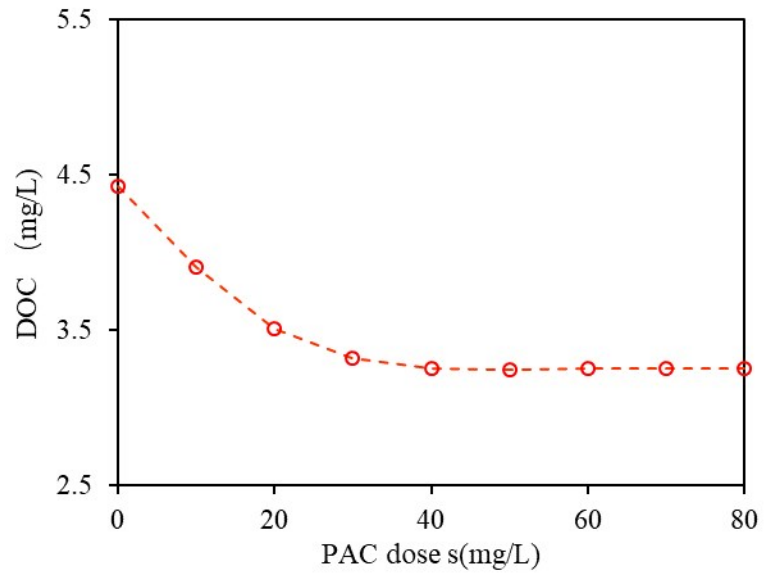

Fig. S1 Isotherm adsorption curve of PAC used

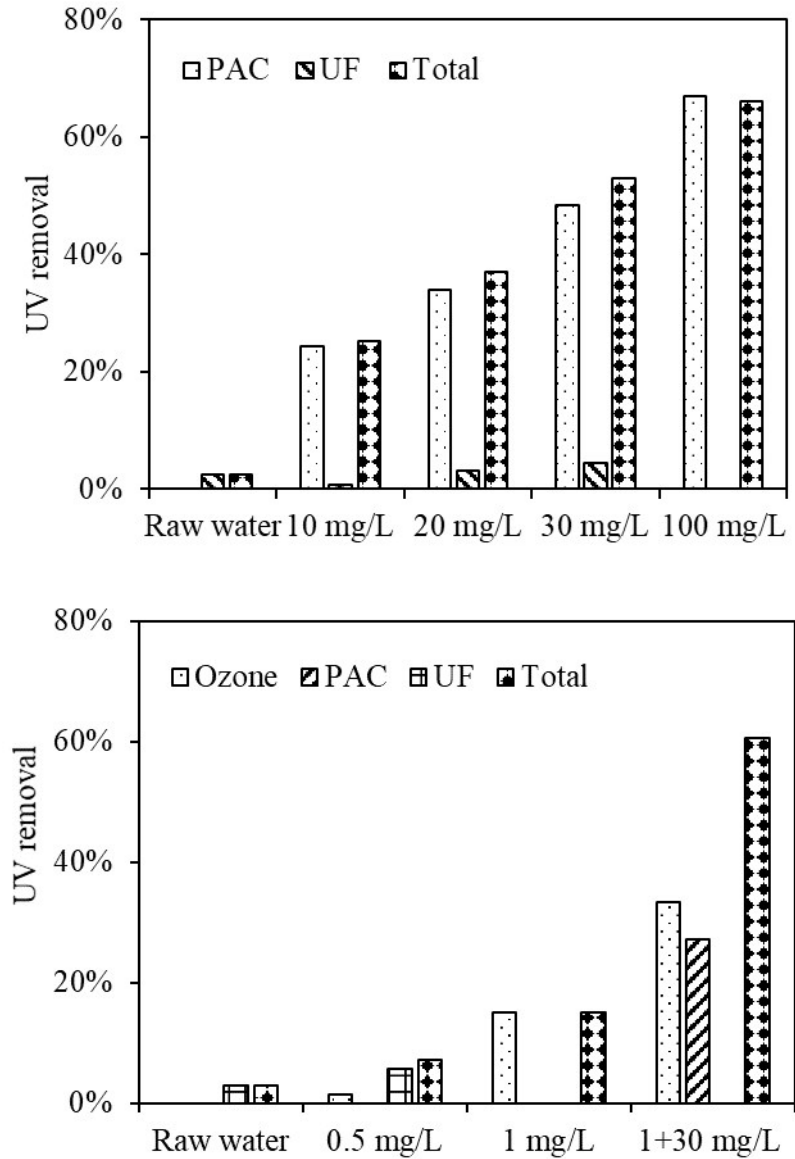

Fig. S2. UV removal during UF treatment and PAC and ozone treatment

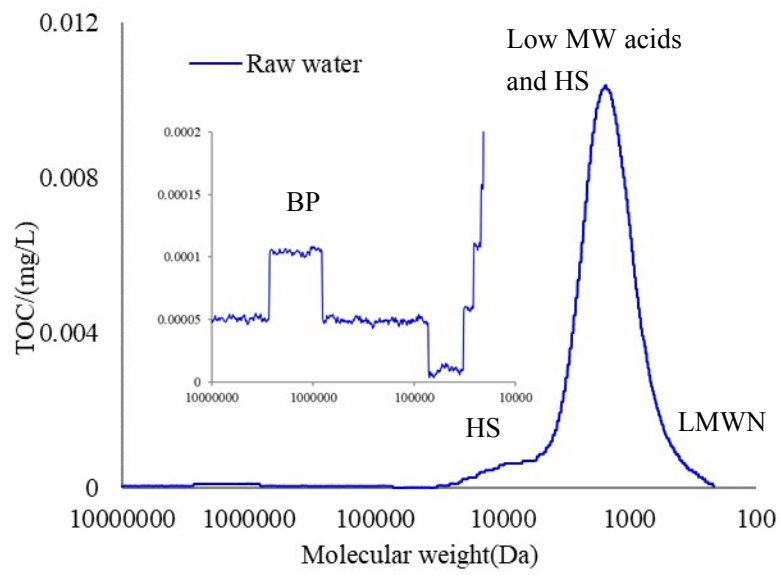

Fig. S3. MW distribution of raw water

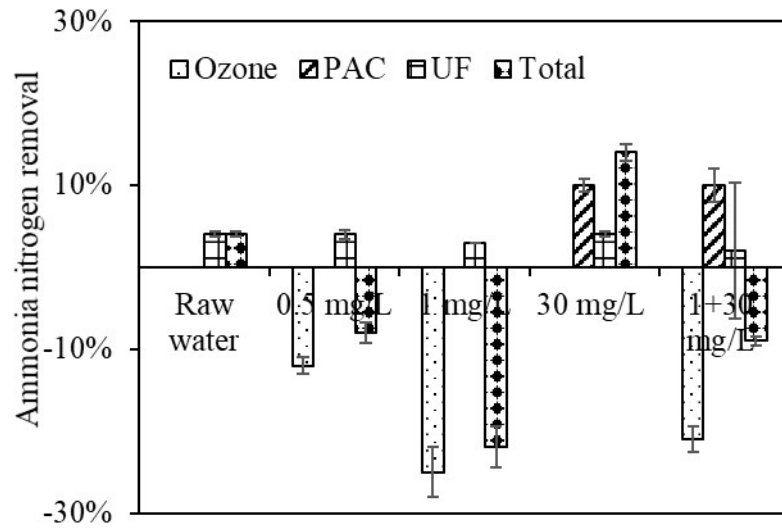

Fig. S4. Ammonia nitrogen removal by PAC and ozone treatment during UF

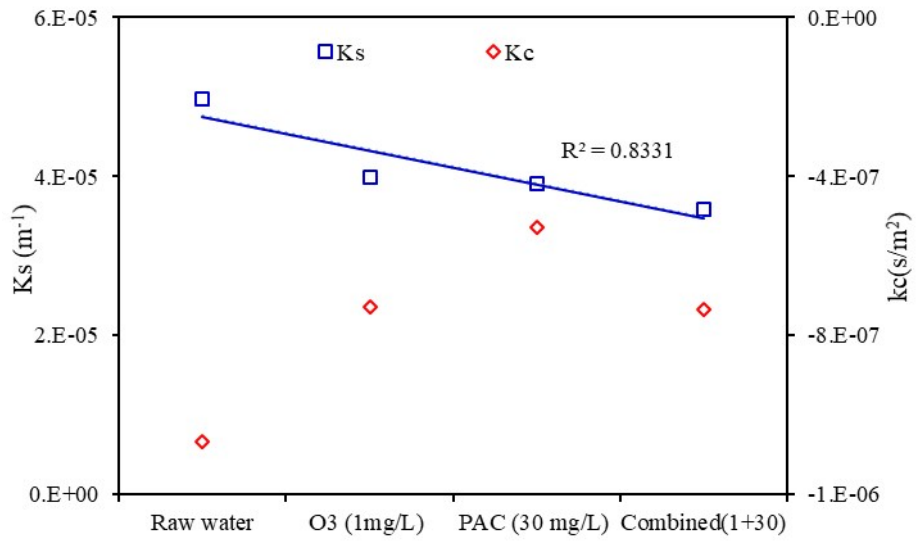

Fig. S5 Fitting parameters under various PAC/ ozone treatment.

Table S1 The Characteristics of PAC used

| PAC                                    |       |
|----------------------------------------|-------|
| Moisture (%)                           | 8.6   |
| Ash (%)                                | 4.4   |
| Ph (5%)                                | 5.8   |
| Methylene blue adsorption<br>(ml/0.1g) | 16    |
| BET (mg/L)                             | 1632  |
| particle size D (4,3)                  | 26.63 |
| D(3,2)                                 | 10.93 |
| D(10)                                  | 5.51  |
| D(50)                                  | 22.23 |
| D(90)                                  | 53.73 |
| Carboxyl (mmol/g)                      | 1.53  |
| Lactone group (mmol/g)                 | 1.28  |
| Basic group(mmol/g)                    | 0.26  |

Table S2 The Peak areas of HPSEC-OCD chromatograms with peak-fitting for the feed and permeate by UF under ozone and PAC treatment.

| Sample<br>(mg/L) | Parts of the HPSEC-OCD chromatogram |        |       |       |
|------------------|-------------------------------------|--------|-------|-------|
|                  | Peak A                              | Peak B | PeakC | PeakD |
| Source           | 100*                                | 30.3*  | 3.43* | 2.83* |
| 0.5              | 83*                                 | 1*     | 0*    | 10*   |
| 1                | 53*                                 | -3*    | 3*    | 12*   |
| 30               | 73.8*                               | 7*     | -2*   | 4*    |
| 1+30             | 0*                                  | 6*     | -5*   | 11*   |
